# BRAINformat: A Data Standardization Framework for Neuroscience Data

Oliver Rübél<sup>1,2,\*</sup>, Prabhat<sup>2</sup>, Peter Denes<sup>3</sup>, David Conant<sup>4</sup>, Edward Chang<sup>4</sup>, and Kristofer Bouchard<sup>5</sup>

<sup>1</sup>Computational Research Division, Lawrence Berkeley National Laboratory (LBNL), Berkeley, CA, USA

<sup>2</sup>National Energy Research Scientific Computing Center, LBNL, Berkeley, CA, USA

<sup>3</sup>Physical Sciences Division, LBNL, Berkeley, CA, USA

<sup>4</sup>UCSF Medical Center, University of California San Francisco, San Francisco, CA, USA

<sup>5</sup>Biological Systems and Engineering Division, LBNL, CA, USA

Correspondence\*:

Oliver Rübél

Computational Research Division, Lawrence Berkeley National Laboratory, 1 Cyclotron Road, M/S 50F1650, Berkeley, CA, 94720, USA, [oruebel@lbl.gov](mailto:oruebel@lbl.gov)

## 2 ABSTRACT

3 Neuroscience is entering the era of ‘extreme data’ with little experience and few plans for the associated  
4 volume, velocity, variety, and veracity challenges. This is a serious impediment for both the sharing of data  
5 across labs, as well as the utilization of modern and high-performance computing capabilities to enable  
6 data driven discovery. Here, we introduce BRAINformat, a novel file format and model for management  
7 and storage of neuroscience data. The BRAINformat library defines application-independent design  
8 concepts and modules that together create a general framework for standardization of scientific data.

9 We describe the formal specification of scientific data standards, which facilitates sharing and  
10 verification of data and formats. We introduce the concept of *Managed Objects*, enabling semantic  
11 components of data formats to be specified as self-contained units, supporting modular and reusable  
12 design of data format components and file storage. The BRAINformat is built off of HDF5, enabling  
13 portable, scalable, and self-describing data storage. We introduce the novel concept of *Relationship*  
14 *Attributes* for modeling and use of semantic relationships between data objects, and discuss the  
15 annotation of data using dedicated data annotation modules provided by the BRAINformat library. Based  
16 on these concepts we implement dedicated, application-oriented modules and design a data standard for  
17 neuroscience data. The BRAINformat software library is open source, easy-to-use, and provides detailed  
18 user and developer documentation and is freely available at: [https://bitbucket.org/oruebel/](https://bitbucket.org/oruebel/brainformat)  
19 [brainformat](https://bitbucket.org/oruebel/brainformat).

20 **Keywords:** data format specification, neuroscience data format

## 1 INTRODUCTION

21 Neuroscience research is facing an increasingly challenging 'big data' problem due to the growing complexity of experiments  
22 and the volume/variety of data being collected from many acquisition modalities. Neuroscientists are routinely collecting data in  
23 a broad range of data formats that are often highly domain specific, ad-hoc and/or designed for efficiency with respect to very  
24 specific tools and data types. Even for single experiments, scientists are interacting with often tens of different formats—one for  
25 each recording device and/or analysis—while many data standards are not well-described or are only accessible via proprietary  
26 software. Navigating this quagmire of formats hinders efficient data analysis, data sharing, and collaboration and can lead to  
27 errors and misinterpretation of data. File formats and data standards that can represent complex neuroscience data and make  
28 the data easily accessible play a key role in enabling scientific discovery, development of reusable tools for data analytics, and  
29 progress towards fostering collaboration in the neuroscience community.

30 The requirements towards a data format standard for neuroscience are highly complex and go far beyond the needs of  
31 traditional, data modality-specific formats (e.g. image, audio, or video formats). A neuroscience data format needs to support the  
32 management and organization of complex collections of data from many modalities and sources, e.g., neurological recordings,  
33 audio and video recordings, eye-tracking, motion tracking, task contingencies, external stimuli, derived analytic results, and  
34 many others. To enable data interpretation and analysis, the format needs to also support storage of complex metadata, e.g.,  
35 descriptions of recording devices, experiments, subjects etc..

36 Advanced neurosciences analytics furthermore rely on complex data access patterns driven by data semantics. For example, to  
37 study human brain activity underlying speech, scientists need to be able to efficiently annotate and extract data using complex  
38 combinations of annotations. Annotating data in itself, however, is a highly complex task that requires the coordinated access to  
39 related data sources. For example, a scientists may use audio or video recordings to identify particular events of interest and in  
40 turn needs to locate the corresponding data in a neural recording dataset to annotate it. Therefore, it is crucial that neuroscience  
41 formats support annotation of data as well as the specification and use of relationships between data objects.

42 In addition to these more application-specific needs, a usable, sustainable, and extensible data format also needs to satisfy a  
43 broad range of general, advanced file format and API requirements — e.g, the format should be self-describing, easy-to-use,  
44 efficient, portable, scalable, verifiable, easy to share and should support self-contained and modular storage of large data.  
45 Meeting all these complex needs is a daunting challenge. Arguably, the focus of a neuroscience-oriented data standard should be  
46 on addressing the application-centric needs of organizing scientific data and metadata, rather than on reinventing file storage  
47 and format methods. For the development of BRAINformat we have utilized HDF5 as the basic storage format as it already  
48 satisfies a broad range of the more basic format requirements—HDF5 is self-describing, portable, extensible, widely supported  
49 by programming languages and analysis tools, and is optimized for storage and I/O of large-scale scientific data.

50 In this manuscript we introduce the BRAINformat, a novel data format standardization framework and API for scientific data,  
51 developed at the Lawrence Berkeley National Labs in collaboration with neuroscientists at UCB and UCSF. BRAINformat  
52 supports the formal specification and verification of scientific data formats and supports the organization of data in a modular,  
53 extensible, and reusable fashion via the concept of *managed objects* (Sec. 3.1). To enable the modeling and use of complex  
54 relationships between data objects, we introduce the novel concept or *relationship attributes*. Relationship attributes support the  
55 specification of structural and semantic links between data, enabling users and developers to formally document and utilize  
56 relationships in a well-structured and programmatic fashion (Sec. 3.2). We demonstrate the use of chains of relationships to  
57 model complex relationships between multi-dimensional arrays based on data registration via the concept of advanced *index*  
58 *map relationships* (Sec. 3.2.4). The BRAINformat library and format also provides advanced support for definition, storage,  
59 and management of complex collections of data annotations (Sec. 3.3). We demonstrate the application of our framework to  
60 design a novel data standard for neuroscience data and its application to the storage and management of electrocorticography  
61 data collected during speech production (Sec. 4).

## 2 BACKGROUND AND RELATED WORK

62 The scientific community utilizes a broad range of data formats, which typically focus on different levels of the data organization  
63 and storage problem. Basic formats explicitly specify how data is laid out and formatted in binary or text data files (e.g., CSV,  
64 BOF, etc). While such basic formats are common in practice, they generally suffer from a lack of portability, scalability and a  
65 rigorous specification. For text-based files, languages and formats, such as the Extensible Markup Language (XML) [2] or the  
66 JavaScript Object Notation (JSON) [1], have become popular means to standardize documents for interchange of data. XML,  
67 JSON and other text-based data standards (in combination with character-encoding schema, e.g. ASCII or Unicode) play a  
68 critical role in practice in the exchange of usually relatively small, structured documents but are impractical for storage and  
69 exchange of large scientific data arrays due to the large overheads and cost they entail for storage, transfer, and I/O.

70 For storage of large-scale scientific data, HDF5 [14] and NetCDF [10] among others, have gained wide popularity. HDF5 is a  
71 data model, library, and file format for storing and managing large and complex data. HDF5 defines a set of core data object  
72 primitives, specifically: i) *Groups* which are similar to folders on a file system, used to group data objects, ii) *Datasets* which  
73 define n-dimensional arrays of arbitrary shape and data type, and iii) *Attributes* which are small meta data objects describing  
74 the nature and/or intended usage of groups or datasets. These data object primitives in combination provide the foundation  
75 for the organization and storage of highly complex data. HDF5 is portable, scalable, self-describing, and extensible and is  
76 optimized for storage and I/O of large-scale data. HDF5 is widely supported across programming languages and systems—e.g. R,  
77 Matlab, Python, C, Fortran, VisIt, ParaView etc.—and the HDF5 technology suite includes tools and applications for managing,  
78 manipulating, viewing, and analyzing data in the HDF5 format. HDF5 has been adopted as a base format across a broad range of  
79 application sciences, ranging from physics to bio-sciences and beyond<sup>1</sup>. Self-describing formats like HDF5 address the critical  
80 need for standardized storage and exchange of complex and large scientific data.

81 Even when self-describing formats like HDF5 are used, the organization of data—such as the structure, names, and descriptions  
82 of storage objects, e.g., groups, datasets or attributes—often still differ between applications and experiments. This diversity  
83 makes the development of common and reusable tools for processing, exchange, analysis, and visualization of data challenging.  
84 Some formats, e.g., VizSchema [12] and XDMF [3], propose to bridge this gap between general-purpose, self-describing formats  
85 and the need for standardized tools for data exchange, processing, and interpretation by augmenting HDF5 via lightweight,  
86 low-level schema (often based on XML) to further describe the organization of data. For example, the primary goal of XDMF  
87 (eXtensible Data Model and Format) [16, 3] is to help standardize methods to exchange scientific data between high-performance  
88 computing codes and tools. XDMF distinguishes and separates so-called light and heavy data. Light data contains the basic  
89 description of data arrays—e.g. the value type (float, integer, etc.), precision, location, rank, and dimensions of data arrays—  
90 while heavy data refers to the actual multi-dimensional arrays storing scientific data values. XDMF stores light data in XML  
91 while heavy data is stored in HDF5. The focus of formats like XDMF and VizSchema is primarily the standardized description  
92 of the low-level data organization to facilitate data exchange and tool development.

93 In contrast to XDMF and VizSchema, application oriented formats generally focus on specifying the organization of data in a  
94 semantically meaningful fashion, including but not limited to: the specification of storage object names, locations, descriptions,  
95 and data hierarchies. Many scientific application formats build on existing self-describing formats (e.g. HDF5), and examples  
96 include the NeXus [8] format for neutron, x-ray, and muon data, the OpenMSI format for mass spectrometry imaging data [11],  
97 the CXIDB format [9] for coherent x-ray imaging and many others. Application formats are often described by documents that  
98 specify the precise location and names of data items and in many cases provide some form of application-programmer interface  
99 (API) to facilitate reading and writing of format files. Some formats are further governed by formal, computer-readable, and  
100 verifiable specifications. For example, NeXus uses NXDL<sup>2</sup>, an XML-based format and schema that allows scientists to define

<sup>1</sup> HDF users – <https://www.hdfgroup.org/HDF5/users5.html>

<sup>2</sup> NeXus Definition Language (NXDL) – <http://download.nexusformat.org/doc/html/nxd1.html>

101 the nomenclature and arrangement of information in a NeXus data file. On the level of HDF5 groups, NeXus also uses the  
102 notion of *Classes* to define the fields that a group should contain in a reusable and extensible fashion.

103 The critical need for data standards in neuroscience research has been recognized by several efforts over the course of the  
104 last several years; however, much work remains. Here, our goal is to contribute to this discussion by instantiating a usable and  
105 sustainable data standard for neuroscience research. The developers of the *Klustakwik* suite [7, 6] have proposed an HDF5-based  
106 data format for storage of spike sorting data. *Orca* (also called *BORG*) is an HDF5-based format developed by the Allen Institute  
107 for Brain Science designed to store electrophysiology and optophysiology data<sup>3</sup>. The *NIX* [13] project has developed a set of  
108 standardized methods and models for storing electrophysiology and other neuroscience data together with their metadata in one  
109 common file format based on HDF5. Rather than an application-specific format, NIX defines highly generic models for data as  
110 well as for metadata that can be linked to terminologies (defined via *odML*) to provide a domain-specific context for elements.  
111 The *open metadata Markup Language odML* [5] is a metadata markup language based on XML with the goal to define and  
112 establish an open and flexible format to transport neuroscience metadata. *NeuroML* [4] is also an XML-based format with a  
113 particular focus on defining and exchanging descriptions of neuronal cell and network models. The neurodata without borders  
114 (NWB)<sup>4</sup> initiative is a recent project with the goal “[...] to produce a unified data format for cellular-based neurophysiology  
115 data based on representative use cases initially from four laboratories – the Buzsaki group at NYU, the Svoboda group at Janelia  
116 Farm, the Meister group at Caltech, and the Allen Institute for Brain Science in Seattle.” Members of the NIX, KWIK, Orca,  
117 BRAINformat, and other development teams<sup>5</sup> have been invited and have contributed to the NWB effort. NWB has adopted  
118 concepts and methods from a range of these formats, including from the here-described BRAINformat.

### 3 STANDARDIZING SCIENTIFIC DATA

#### 119 3.1 Data Organization and File Format API

120 BRAINformat adopts HDF5 as its main storage backend and uses the following primary storage primitives to organize data  
121 within files:

- 122 • **Group:** A group is used—similar to a folder or directory on a file system—to group zero or more storage objects.
- 123 • **Dataset:** A dataset defines a multidimensional array of data elements, together with supporting metadata (e.g., shape and  
124 data type of the array).
- 125 • **Attribute:** Attributes are small datasets that are attached to primary data objects (i.e., groups or datasets) and are used in  
126 practice to store additional metadata to further describe the corresponding data object.
- 127 • **Dimension Scale:** This is a derived storage primitive that uses a combination of datasets and attributes to associate datasets  
128 with the dimension of another dataset. Dimension scales are used in practice to further characterize the dimensions of a  
129 dataset by describing, for example, the time when samples were measured or the location of samples in space.
- 130 • **Relationship Attributes:** Relationship attributes are a novel, custom attribute-type storage primitive that allows us  
131 to describe and model structural and semantic relationships between primary data objects in a human-readable and  
132 computer-interpretable fashion (described later in Section 3.2).

133 Neuroscience research inherently relies on complex collections of data from many modalities and sources. Examples include  
134 neural recordings, audio and video recordings, eye-tracking, motion tracking, task contingencies, external stimuli, derived  
135 analytic results, and many others. It is therefore critically important to specify formats in a modular and extensible fashion while  
136 enabling users to easily reuse format modules and integrate new ones. The concept of managed objects, which we will describe  
137 next, allows us to address this central challenge in an easy-to-use and scalable fashion.

---

<sup>3</sup> Orca slides presented at NWB: [http://crcns.org/files/data/nwb/h1/NWBh1\\_09\\_Keith\\_Godfrey.pdf](http://crcns.org/files/data/nwb/h1/NWBh1_09_Keith_Godfrey.pdf)

<sup>4</sup> Neurodata without Borders – <https://crcns.org/NWB>

<sup>5</sup> <http://crcns.org/NWB/hackathon-1>

### 138 3.1.1 Managed Objects

139 A managed object is a primary storage object—i.e., file, group, or dataset—with: **1**) a formal, self-contained format  
140 specification that describes the storage object and its contents (see Section 3.1.2), **2**) a specific managed type/class, **3**) a human-  
141 readable description, and **4**) an optional unique object identifier, e.g., a DOI. In file, these basic managed object descriptors are  
142 stored via standardized attributes. Managed object types may be composed—i.e., a file or group may contain other managed  
143 objects—and further specialized through the concept of inheritance, enabling the independent specification and reuse of data  
144 format components. The concept of managed objects significantly simplifies the file format specification process by allowing  
145 larger formats to be specified in an easy-to-manage iterative manner. By encapsulating semantic sub-components, managed  
146 objects provide an ideal foundation for interacting with data in a manner that is semantically meaningful to applications.

147 The BRAINformat library provides dedicated base classes to assist with the specification and development of interfaces for  
148 new managed object types. The *ManagedObject* base API implements common features to **1**) define the specification of a  
149 given managed type, **2**) recursively construct the complete format specification, automatically resolving nesting of managed  
150 objects, **3**) verify format compliance of a given HDF5 object, **4**) provide access to all common managed object descriptors stored  
151 in file (i.e., type, description, specification, and object identifier), and provides a standardized interface to **5**) access contained  
152 objects (e.g. datasets, groups, managed object etc.) from file, **6**) retrieve all managed object instances of a given managed type,  
153 and **7**) create appropriate manager class instances for a given HDF5 object based on the objects managed type.

154 In addition, the *ManagedObject* base API defines and implements a standardized approach for creation of specific instances  
155 of managed objects stored in file via a common *create(..)* method. Managed groups and datasets may be stored either directly  
156 within the parent managed group or created externally in a separate *ManagedObjectFile* file storage container and included in  
157 the parent via an external link. In this way, the API directly supports self-contained and modular data storage in a transparent  
158 fashion. Self-contained storage eases data sharing, as all data is contained within a single file, while modular storage allows us  
159 to more easily manage file sizes and reduce the risk for file corruption by minimizing changes to existing files. From a user's  
160 perspective, modular and self-contained storage are handled transparently, i.e., a user can interact with managed objects in the  
161 same manner independent of whether the object is stored internal or external to the current HDF5 file.

162 To implement a new managed object type, a developer simply needs to define a new class that inherits from the appropriate base  
163 managed class type—i.e., *ManagedFile*, *ManagedGroup*, and *ManagedDataset*—and implement: **1**) the class method  
164 *get\_format\_specification(...)* to create a formal format specification document (described next in Sec. 3.1.2) and **2**) the  
165 object method *populate(...)*, which is called by the standardized *ManagedObject.create(...)* method and is used to implement  
166 the type-specific population of managed storage objects to ensure format compliance upon creation—i.e., the goal is to avoid  
167 that managed objects can be created in an invalid, non-format-compliant state to ensure that files remain format compliant  
168 throughout their life cycle.

### 169 3.1.2 Format Specification

170 To enable the broad application and use of data formats, it is critical that the underlying data standard is easy to interpret by  
171 application scientists as well as unambiguously specified for programmatic interpretation and implementation by developers.  
172 Therefore, each data format component (i.e. managed object type) is described by a formal, self-contained format specification  
173 that is computer interpretable while at the same time including human-readable descriptions of all components.

174 We generally assume that format specifications are minimal, i.e., all file objects that are defined in the specification must  
175 adhere to the specification, but a user may add user-defined data objects (i.e., groups, datasets, attributes etc.) to a file without  
176 violating format compliance. The relaxed assumption of a minimal specification ensures on the one hand that we can share  
177 and interact with all format-compliant files and file components in a standardized fashion, while at the same time enabling  
178 users to easily integrate dynamic and custom data (e.g. instrument-specific metadata), allowing researchers to save all their data  
179 using BRAINformat even if the current file standard should only partially cover the specific use-case. This is critical to enable

180 scientists to easily adopt the file standard and to allow the file standard to adapt to the ever-evolving experiments, methods, and  
181 use-case in neuroscience and facilitate new science rather than impeding it.

182 The BRAINformat library defines format specification document standards for the specification of the format of 1) files,  
183 2) groups, 3) datasets, 4) attributes, 5) dimension scales, 6) managed objects, and 7) relationship attributes. All specification  
184 documents are based on hierarchically composed Python dictionaries that can be serialized as JSON documents for persistent  
185 storage and sharing. For all data objects we specify the name and/or prefix of the object, whether the object is optional or  
186 required, and provide a human-readable textual description of the purpose and content of the object. Depending on the object  
187 type (e.g. file, group, dataset, attribute, etc.) additional information is specified, e.g., i) the datasets, groups, and managed objects  
188 contained in a group or file, ii) attributes for datasets, groups and files, iii) dimension scales of a dataset, iv) whether a dataset is  
189 a primary dataset for visualization and analysis or iv) relationships between objects among others. Figure 1 shows as an example  
190 an abbreviated summary of the format specification of our proposed data standard for neuroscience (described later in Section 4).  
191 Supplement 2 provides a more detailed discussion and examples of our format specification model. Relationship attributes and  
192 their specification are discussed in detail later in Sec. 3.2.

193 The BRAINformat library implements a series of dedicated data structures to assist with the development and interaction with  
194 format specifications. Using the provided data structures helps ensure that the generated documents are valid—e.g., that all  
195 required keys are set and that only valid keys and values are included in a document—and supports the incremental creation of  
196 format specifications, allowing the developer to step-by-step define and compose format specifications—similar to how one  
197 typically creates HDF5 files. For example, the following simple code can be used to generate the parts of the *BrainDataECoG*  
198 specification shown in Fig. 1:

```
>>> from brain.dataformat.spec import *
>>> # Define the raw dataset and associated attribute and dimension
>>> raw_data_spec = DatasetSpec(dataset='raw_data', prefix=None, optional=False, primary='True',
                               description="Dataset with the ECoG recordings data")
>>> raw_data_spec.add_attribute( AttributeSpec(attribute='unit', prefix=None, value='Volt') )
>>> raw_data_spec.add_dimension( DimensionSpec(name='space', unit='id', dataset='electrode_id',
                                               axis=0, description="Id of the recording electrode") )
>>> # Define the group and add the dataset
>>> brain_data_ecog = GroupSpec(group=None, prefix='ecog_data_',
                                description="Managed group for storage of raw ECoG recordings.")
>>> brain_data_ecog.add_dataset(raw_data_spec, 'ecog_data')
```

199 Using the BRAINformat specification infrastructure we can easily compile a complete data format specification document  
200 that lists all managed object types and their format. For example, the simple Python code shown here compiles the format  
201 specification document for our neuroscience data format directly from the Python API of our format (see also Sec. 4):

```
>>> from brain.dataformat.spec import FormatDocument
>>> import brain.dataformat.brainformat as brainformat
>>> json_spec = FormatDocument.from_api(module_object=brainformat).to_json()
```

202 Figure 1 shows an abbreviated summary of the result of the above code. The full JSON document is shown in Supplement 2, pp.  
203 51 – 61. Alternatively, we can also recursively construct the complete specification for a given managed object type —e.g., here  
204 for the main file of the proposed neuroscience format described in Sec. 4— via:

```
>>> from brain.dataformat.brainformat import BrainDataFile
>>> from brain.dataformat.spec import *
>>> format_spec = BrainDataFile.get_format_specification_recursive() # Construct the document
>>> file_spec = BaseSpec.from_dict(format_spec) # Verification of the document
>>> json_spec = file_spec.to_json(pretty=True) # Convert the document to JSON
```

```
{
  "BrainDataFile": {...},
  "BrainDataMultiFile": {...},
  "BrainDataData": {
    "attributes": [],
    "datasets": {},
    "description": "Managed group for storage of brain data (internal and external).",
    "group": "data",
    "groups": {},
    "managed_objects": [{"format_type": "BrainDataInternalData", "optional": false},
                       {"format_type": "BrainDataExternalData", "optional": false}],
    "optional": false,
    "prefix": null,
    "relationships": []
  },
  "BrainDataInternalData": {...},
  "BrainDataECoG": {
    "attributes": [],
    "datasets": {
      "ecog_data": {
        "attributes": [{"attribute": "unit", "optional": false,
                       "prefix": null, "value": "Volt"}],
        "dataset": "raw_data",
        "description": "Dataset with the ECoG recordings data",
        "dimensions": [{"axis": 0,
                       "dataset": "electrode_id",
                       "description": "Id of the recording electrode",
                       "name": "space",
                       "optional": false,
                       "relationships": [],
                       "unit": "id"},
                      ...
                     ],
        "dimensions_fixed": true,
        "optional": false,
        "prefix": null,
        "primary": true,
        "relationships": []
      },
      ...
    },
    "description": "Managed group for storage of raw ECoG recordings.",
    "group": null,
    "groups": {},
    "managed_objects": [...],
    "optional": false,
    "prefix": "ecog_data_",
    "relationships": []
  },
  "BrainDataECoGProcessed": {...},
  "AnnotationDataGroup": {...},
  "BrainDataExternalData": {...},
  "BrainDataDescriptors": {...},
  "BrainDataDynamicDescriptors": {...},
  "BrainDataStaticDescriptors": {...},
  "ManagedObjectFile": {...},
}
```

| Legend    |                                                                                       |
|-----------|---------------------------------------------------------------------------------------|
| ...       | This part has been omitted from the document. See Supplement 2 pp. 51–61 for details. |
| BrainData | Managed Object Type                                                                   |
| {...}     | Format specification                                                                  |

**Figure 1.** Abbreviated specification document for our neuroscience data format listing all current managed object types and partial specification for select structures illustrating the general structure of a formal specification document generated using the BRAINformat library. The full specification document is available as part of Supplement 2 pp. 51 – 61 (and the full recursive specification for a brain format file is shown in Supplement 2 pp. 35 – 51).

205 In this case, all references to other managed objects are automatically resolved and their specification is directly embedded in  
206 the resulting specification document. While the basic specification for *BrainDataFile* consists only of  $\approx 14$  lines of code (see  
207 Supplement 2, pp. 30), the full, recursive specification contains more than 910 lines (see Supplement 2, pp. 35 – 51), illustrating  
208 the critical importance for being able to incrementally define format specifications.

209 The ability to compile complete format specification documents directly from data format APIs allows developers to easily  
210 integrate new format components (i.e. managed object types) in a self-contained fashion simply by adding a new API class

211 without having to maintain separate format specification documents. Furthermore, this strategy avoids inconsistencies between  
212 data format APIs and specification documents since format documents are updated automatically.

213 The concept of managed objects in combination with the format specification language and API provide an application-  
214 independent design concept that allows us to define application-specific formats and modules that are build on best practices.

## 215 3.2 Modeling Data Relationships

216 Neuroscience data analytics often rely on complex structural and semantic relationships between datasets. For example a  
217 scientist may use audio recordings to identify particular speech events during the course of an experiment and in turn needs to  
218 locate the corresponding data in an electrocorticography recording dataset to study the neural response to the speech events.  
219 In addition, we often encounter structural relationships in data, for example, in the case of data structures where one array  
220 indexes another array or two arrays share data dimensions because they have been acquired using the same recording device  
221 and many others. To enable efficient analysis, reuse, and sharing of neuroscience data it is critical that we can model the  
222 complex relationships between data objects in a structured fashion to enable human and computer interpretation and use of data  
223 relationships.

224 Modeling data relationships is not well-supported by traditional data formats, but is typically closer to the domain of scientific  
225 databases. In HDF5, we can compose data via HDF5 links (soft and hard) and associate datasets with the dimensions of another  
226 dataset via the concept of dimension scales. However, these concepts are limited to very specific types of data links that do not  
227 describe the semantics of the relationship. A new general approach is needed to describe more complex semantic links between  
228 data objects in HDF5.

### 229 3.2.1 Specifying and Storing Relationships

230 Here we introduce the novel concept of *relationship attributes* to describe complex semantic relationships between a source  
231 object and a target data object in a general and extensible fashion. Relationship attributes are associated with the source object  
232 and describe how the source is related to the target data object. The source and target of a relationship may be either a HDF5  
233 group or dataset.

234 Relationship attributes are—like other file components— specified via a JSON dictionary and are part of the specification of  
235 datasets and groups. Like any other data object, relationships may also be created dynamically to describe any relationships that  
236 are unknown *a priori*. Specific instances of relationships are stored as attributes on the source HDF5 object, where the value of  
237 the attribute is the JSON document describing the relationship. As illustrated in Fig. 2, the JSON specification of a relationship  
238 consists of the following main components:

- 239 1.The specification of the name of the attribute and whether the attribute is optional. When stored in HDF5 we prepend the  
240 prefix *RELATIONSHIP\_ATTR\_* to the user-defined name of the attribute to describe the attribute's class and ease  
241 identification of relationship attributes.
- 242 2.A human-readable description of the relationship and an optional JSON dictionary with additional user-defined data relevant  
243 to the relationship.
- 244 3.The specification of the type of the relationship (described next in Sec. 3.2.2).
- 245 4.The specification of the axes of the source object to which the relationship applies. This may be: i) a single index, ii) a list  
246 of axes, iii) a dictionary of axis indices if the axes have a specific user meaning, or iv) None if the relationship applies to  
247 the source object as a whole. Note, we do not need to specify the location of the source object, as the specification of the  
248 relationship is always associated with either the source object in HDF5 itself or in the format specification.
- 249 5.The specification of the target object describing the location of the object and the axes relevant to the relationship (using the  
250 same relative ordering or names of axes as for the source object).



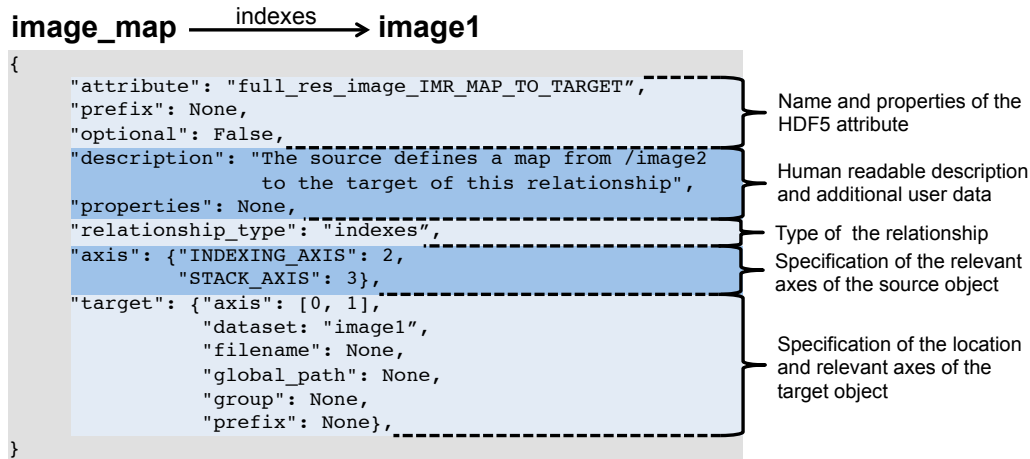

Figure 2. Example specification of a relationship attribute illustrating the main components of the specification.

### 251 3.2.2 Relationship Types

252 The relationship type describes the semantic nature of the relationship. The BRAINformat library currently supports the  
253 following main types of relationships, and additional types can be added in the future:

- 254 • **order:** This relationship type indicates that elements along the specified axes of the relationship are ordered in the target in  
255 the same way as in the source. This type of relationship is very common in practice. For example, in the case of dimension  
256 scales, an implicit assumption is that the ordering of elements along the first axis of the scale-dataset matches the ordering  
257 of the elements of the dimension it describes. This assumption, however, is only implicit and is by no means always true  
258 (nor does HDF5 require this relationship to be true). Using an *order* relationship we can make this relationship explicit.  
259 Other common uses of *order* relationships include describing the matched ordering of electrodes in datasets that have been  
260 recorded using the same device or matched ordering of records in datasets that have been acquired synchronously.
- 261 • **equivalent:** This relationship type expresses that the source and target object encode the same data (even if they might store  
262 different values). This relationship also implies that the source and target contain the same number of values ordered in the  
263 same fashion. This relationship occurs in practice any time the same data is stored multiple times with different encodings.  
264 For example to facilitate data processing a user may store a dataset of strings with the names of tokens and store another  
265 dataset with the equivalent integer ID of the tokens.
- 266 • **indexes:** An indexes relationship describes that the source dataset contains indices into the target data object (group or  
267 dataset). In practice this relationship type is used to describe basic data structure where we store, for example, a list of  
268 unique values (tokens) along with other arrays that reference that list.
- 269 • **shared encoding:** This relationship indicates that the source and target data object contain values with the same encoding  
270 so that the values can be directly compared (via equals "=="). This relationship is useful in practice any time two data  
271 objects (datasets or groups) contain data with the same encoding (e.g. two datasets describing external stimuli using the  
272 same ontology).
- 273 • **shared ascending encoding:** This relationship type implies that the source and target data object share the same encoding  
274 and in addition that the values are sorted in ascending order in both data objects. The additional constraint on the ordering  
275 enables i) comparison of values via greater than ">" and less than "<" (in addition to equals "==") and ii) more efficient  
276 processing and comparison of data ranges. For example, in the case of two datasets that encode *time*, we often find that  
277 individual time points do not match exactly between the source and target (e.g. due to different sampling rates). However,  
278 due to the ascending ordering of values, a user is still able to compare ranges in *time* in a meaningful way.

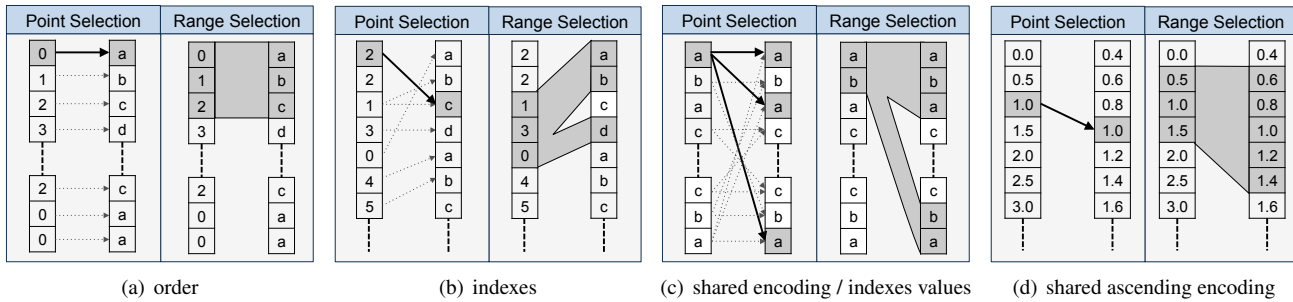

**Figure 3.** Overview of the main relationship types and the implied mapping of point- and range-based selections from the source to the target object. In each cell we show the source object on the left and the target object of the relationship on the right. **(a)** For *order* relationships we can directly map array indices between the data objects. In the case of *order* relationships involving HDF5 Groups we assume alphabetic ordering of elements. **(b)** In the case of *indexes* relationships we map selections by retrieving the relevant indices from the source array. **(c)** For *shared encoding* and *indexes values* relationships we support data selection via value-based data mapping, i.e., we map selections by locating all data values in the target object that match at least one of the values we selected in the source object. **(d)** *Shared ascending encoding* relationships behave in general similar to *shared encoding* relationships, however, the additional constraint that values are sorted in ascending order enables us to map range selections directly based on the minimum and maximum value selected in the source dataset (in contrast to the strict equal value matching of *shared encoding*). **(e)** *User* relationships define custom user semantics and do not imply a specific mapping between data elements (not shown).

- 279 • **indexes values:** This relationship is typically used to describe value-based referencing of data and indicates that the source  
280 data object selects certain parts of the target data object based on data values (or keys in the case of groups). This relationship  
281 is a special type of *shared encoding* relationship.
- 282 • **user:** The *user* relationship is a general container to allow users to specify custom semantic relationships that do not match  
283 any of the existing relationship patterns. To further characterize the relationship, we often store additional metadata about  
284 the relationship as part of the user-defined *properties* dictionary of the relationship attribute.

### 285 3.2.3 Using Relationship Attributes

286 Relationship attributes are a direct extension to the previously described format specification infrastructure. Similar to other  
287 main data objects, BRAINformat provides dict-like data structures to help with the formal specification of relationship attributes.  
288 In addition, the BRAINformat library also provides a dedicated *RelationshipAttribute* API, which supports creation and retrieval  
289 of relationship attributes (as well as index map relationship, described in Sec. 3.2.4) and provides easy access to the source and  
290 target HDF5 object and corresponding specifications of relationship attributes.

291 One central advantage of explicitly defining relationships is that it allows formalizing the interactions and collaborative usage  
292 of related datasets. In particular, the relationship types imply formal rules for how to map data selections from the source object  
293 of a relationship to the target object. The *RelationshipAttribute* API implements these rules and supports slicing, which allows us  
294 to easily map selections from the source to the target data object using the same familiar slicing syntax. For example, assume we  
295 have two datasets  $A$  and  $B$  related to each other via an *indexes* relationship  $R_{A \rightarrow B}$ . A user now selects the values  $A[1 : 10]$  in  
296 the source dataset  $A$  and wants to locate the corresponding data values in the target data object  $B$ . Using the BRAINformat API  
297 we can now simply write  $R_{A \rightarrow B}[1 : 10]$  to map the selection  $[1 : 10]$  from the source  $A$  to the target  $B$ , and if desired retrieve  
298 the corresponding data values in  $B$  via  $B[R_{A \rightarrow B}[1 : 10]]$ . Figure 3 provides an overview of the rules for mapping selections  
299 based on the type of the relationship.

300 Relationship attributes standardize the specification, storage, and programmatic interface for creating, discovering, and  
301 using relationships and related data objects. Describing relationships between data explicitly greatly simplifies the process of  
302 interacting with multiple datasets and facilitates the collaborative use of data by enabling utilization of multiple datasets in  
303 conjunction without having to *a priori* know the relationships and datasets involved. In this way, relationship attributes also open  
304 the route for the standardized development of novel data-driven analytics and workflows based on the programmatic discovery  
305 and use of related data objects.

306 3.2.4 Index Map Relationships

307 Beyond the description of direct object-to-object relationships, relationship attributes also form the building blocks that allow  
 308 us to specify higher-order relationships. Using relationship attributes we can define chains of object-to-object relationships  
 309 that, when interpreted in conjunction, express highly complex structural and semantic relationships. For example, imagine  
 310 the following situation. Scientists have acquired an optical microscopy image  $A$  and an electron microscopy image  $B$  of the  
 311 same brain. Using the optical image a scientist identifies a particular brain region of interest and now wants to study the same  
 312 region further using the electron-microscopy image. This seemingly simple task of accessing corresponding data values in two  
 313 related datasets is in practice, however, often highly complex. Even if the data registration problem between the datasets is  
 314 solved, a user still has to know exactly: i) the location of both datasets  $A$  and  $B$ , ii) how the two datasets are related, iii) what the  
 315 transformations generated by the data registration process are, iv) how to utilize that information to map between  $A$  and  $B$ , and  
 316 v) write complex, custom code to access the data.

317 *Index map relationships* allow us to explicitly describe this complex relationship between  $A$  and  $B$  via a simple chain of  
 318 object-to-object relationship attributes and to greatly simplify the cooperative interaction with the data. Rather than describing  
 319 the relationship between  $A$  and  $B$  directly, users can create an intermediate index map  $M_{A \rightarrow B}$  that stores for each pixel in  $A$  the  
 320 index of the corresponding pixel(s) in  $B$ .  $M_{A \rightarrow B}$  explicitly and unambiguously describes the mapping from  $A$  to  $B$  so that  
 321 we can directly utilize the mapping without having to perform complex and error-prone index transformations (which would  
 322 be needed if we described the mapping implicitly, e.g., via scaling, rotation, morphing and other data transformations). As  
 323 the table in Fig. 4 shows, via a simple series of relationship attributes describing simple object-to-object relationships, we can  
 324 unambiguously describe the complex relationship between  $A$  and  $B$  via  $M_{A \rightarrow B}$ . Given only our source dataset  $A$  (or index map  
 325  $M_{A \rightarrow B}$ ) we can now easily discover all relevant data objects ( $A$ ,  $B$ , and  $M_{A \rightarrow B}$ ) and relationships (Fig. 4) without having to *a*  
 326 *priori* know the mapping or the location of the datasets. Via the index map relationship, we can now directly map selections:  
 327 i) from  $A$  to  $M_{A \rightarrow B}$  and *vice versa* ii) from  $M_{A \rightarrow B}$  to  $B$ , and most importantly iii) from  $A$  to  $B$  simply by slicing into our  
 328 *indexes* relationship (Fig. 4, row 3) to retrieve the corresponding indices from our index map  $M_{A \rightarrow B}$ . As data mappings are  
 329 described explicitly, index map relationships enable registration and mapping under arbitrary transformations. Also, mappings  
 330 are not required to be unique—i.e., arbitrary N-to-M mappings between elements are permitted—and the source and target of  
 331 relationships may not just be datasets but also groups, i.e., index map relationship can be used to define mappings between  
 332 contents of groups or even groups and datasets in HDF5.

|    | Source                | Relationship                   | Target                | Description                                                                                                                                                                                                                                                                |
|----|-----------------------|--------------------------------|-----------------------|----------------------------------------------------------------------------------------------------------------------------------------------------------------------------------------------------------------------------------------------------------------------------|
| 1. | $A$                   | $\xrightarrow{\text{order}}$   | $M_{A \rightarrow B}$ | This relationship describes that elements in $A$ are ordered in the same way as the elements in the index map $M_{A \rightarrow B}$ . In addition we may further specify the axes in the source $A$ and target $M_{A \rightarrow B}$ along which the relationship applies. |
| 2. | $A$                   | $\xleftarrow{\text{order}}$    | $M_{A \rightarrow B}$ | Inverse of (1), describing the object ordering relationship between $M_{A \rightarrow B}$ and $A$ .                                                                                                                                                                        |
| 3. | $M_{A \rightarrow B}$ | $\xrightarrow{\text{indexes}}$ | $B$                   | This relationship indicates that $M_{A \rightarrow B}$ stores indices into $B$ and describes how our map can be used to access $B$ . An example specification of this relationship is shown in Fig. 2.                                                                     |
| 4. | $A$                   | $\xrightarrow{\text{user}}$    | $B$                   | An optional user-type relationship may be used to further characterize the semantic relationship between $A$ and $B$ .                                                                                                                                                     |

Figure 4. Overview of the relationships used to define an advanced *index map relationship*. We present a specific example later in Fig. 5.

333 BRAINformat implements the concept of index map relationships—similar to dimension scales and relationship attributes—  
 334 via a set of simple naming conventions for the attribute names. In addition to the *RELATIONSHIP\_ATTR* prefix, we use a set  
 335 of reserved post-fix values—specifically *\_IMR\_MAP\_TO\_TARGET*, *\_IMR\_MAP\_TO\_SOURCE*, *\_IMR\_SOURCE\_TO\_MAP*,  
 336 *\_IMR\_SOURCE\_TO\_TARGET*—that are appended to the user-defined attribute name to identify the different components of the  
 337 index map relationship. The BRAINformat API directly supports index map relationships so that we can, for example, directly

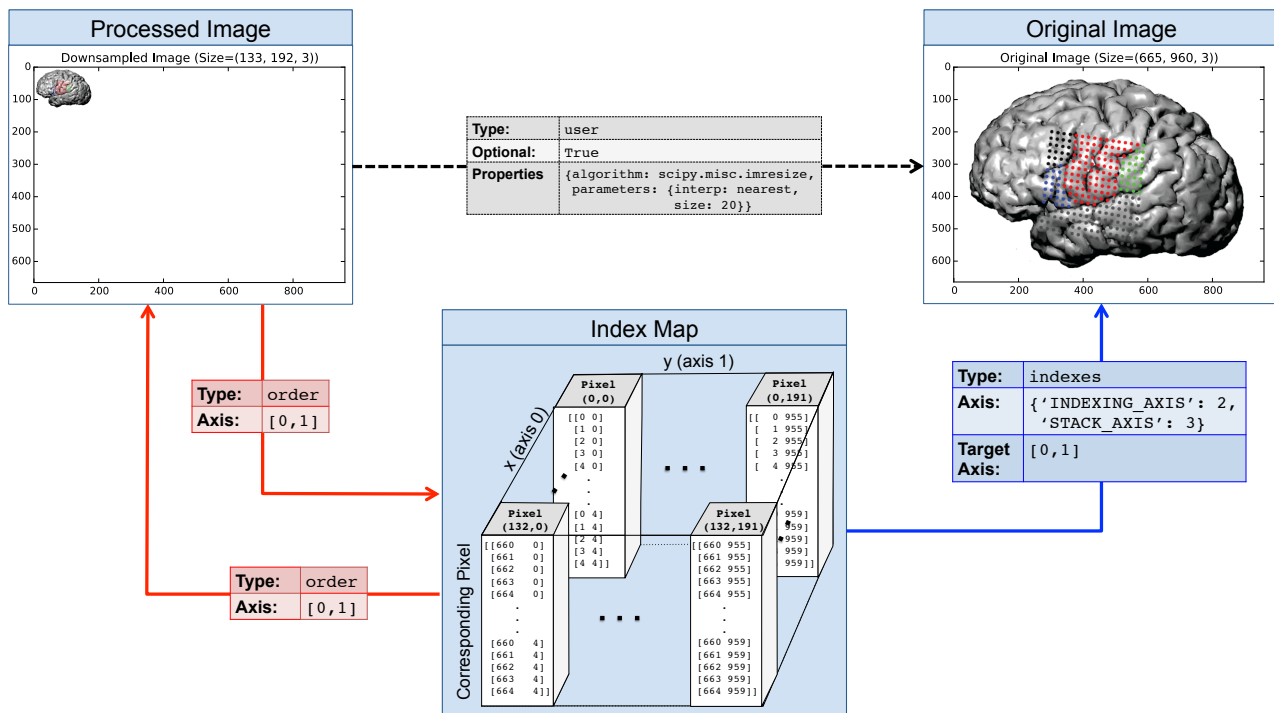

**Figure 5.** Illustration of an index map relationship describing the interaction between a processed image and the original image. The processed image is in this case a 5× smaller version of the original image created using nearest neighbor interpolation. The intermediary index map describes for each pixel in the processed image which pixels it corresponds to in the original image. Two *order* relationships (red arrows) describe the interactions between the processed image and the map and vice versa. A third *indexes* relationship links our index map to the original image and describes how the map can be used to access the original image. Optionally, we may create a fourth *user* relationship (black arrow) to further characterize the semantic relationship between the processed and original image (e.g. to store a description of the algorithm and parameters used to generate the image). Naturally, we can also describe the inverse mapping between the original and processed image via a second index map relationship.

338 create and locate all relationships that define an index map relationship via a single function call and programmatically interact  
 339 with the relationships. Supplement 1 (pp.12–26) includes an overview and basic tutorial of the API for creating and using index  
 340 map relationships.

341 Index map relationships have broad practical applications, including data registration, sup-component analysis, correlation of  
 342 data dimensions, and optimization. Index map relationships are directly applicable to specify the mapping between images in a  
 343 time series or a stack of physical slices as well as to define correspondences between images from different modalities. We  
 344 may also define mappings between select dimensions of a dataset to correlate data from different recordings in time or space.  
 345 Furthermore, analytics are often based on characteristic sub-components of a dataset. As such, a user may extract and separately  
 346 process sub-components of datasets (e.g. a sub-image of a single cell) and use index map relationships to map the extracted or  
 347 derived analysis data back to the original data. To optimize data classification, feature detection, and other compute-intensive  
 348 analyses, a user may perform initial calculations on lower-resolution versions of a dataset and use index map relationships to  
 349 access corresponding data values in the high-resolution version of the dataset for further processing.

350 Figure 5 illustrates an example index map relationship for the latter use-case. The complete source code and further details for  
 351 this example are available in Supplement 3. In this example, our original dataset is a RGB image dataset of size (665 × 960)  
 352 that has been processed to reduce the size in the two spatial dimensions by a factor of 5 to (133 × 3) via nearest neighbor  
 353 interpolation. Each pixel in the processed image, hence, maps to a 5 × 5 sub-region in the original image. We, hence, create  
 354 a 4-dimensional index map dataset where: 1,2) the first two dimensions correspond to the spatial dimensions *x* and *y* of the  
 355 images, 3) the third dimension is our index axis of length 2 since each pixel is described by two integer indices, and 4) the fourth  
 356 dimension is our stacking axis with the list of all corresponding pixel. Using the BRAINformat API, we can now create the  
 357 index map relationship—which is defined by the arrows shown in Figure 5—via a single function call (Supplement 3–Sec. 1.3).

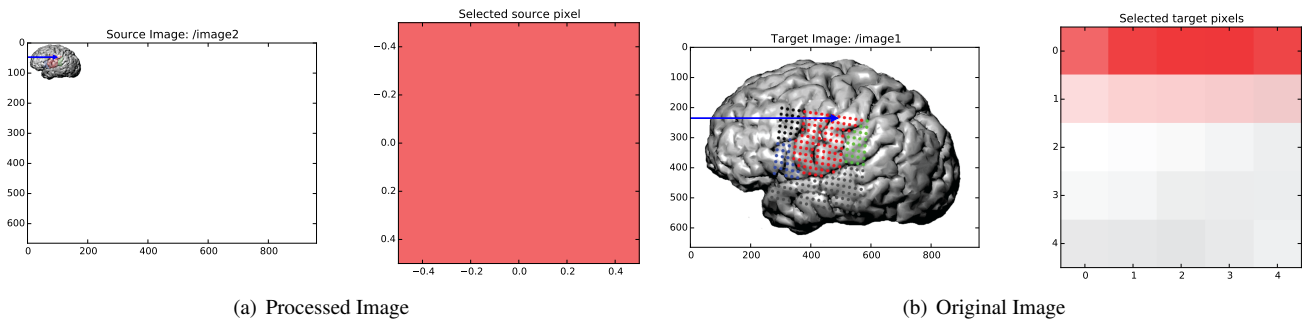

**Figure 6.** Illustration of the result from using our index map relationship to perform data selection in our source, processed image (a) and target, original image (b). (a) First we apply the selection (47, 98) (blue arrow) to our source dataset (left). As expected, this results in the selection of a single pixel (right). (b) We next map the same selection to our target dataset (left). From the blue arrow we can see that the selection was mapped correctly to same relative location as in our source, image. The pixel plot (right) illustrates that the mapping resulted, as expected, in the selection of a  $5 \times 5$  sub-image from our target image. We can also see that the top-left pixel of our selected sub-image matches the color of the pixel we retrieved in the source dataset (a, right). This is expected since the source image (a, left) was generated from the target image (b, left) via  $5 \times$  downsampling using nearest neighbor interpolation.

358 As illustrated in Figure 6, we can now easily map a selection (here [47, 98]) from our source (processed image) to the target  
359 (original) image simply by slicing into our index map relationship (*imr*) via `imr[MAP_TO_TARGET][47, 98]` and retrieve  
360 the data of the corresponding subimage from our original image (Supplement 3–Sec. 1.4).

361 As this simple example illustrates, index map relationships allow us to explicitly describe complex relationships between data.  
362 Being able to unambiguously describe complex relationships is critical to enable us to programmatically utilize relationships and  
363 perform complex multi-data analytics and to reduce risk for errors due to implicit assumptions about relationships between data  
364 objects. Index map relationships are not restricted to just define relationships between HDF5 datasets but can also be used to  
365 define relationships involving HDF5 groups or managed objects. Here we focus on index map relationships, but the same basic  
366 concept of chaining relationships could be applied to construct other types of complex object inter-relationships as well.

### 367 3.3 Annotating Scientific Data

368 Advanced neuroscience analytics rely on complex data access patterns driven by data semantics. For example, common  
369 neuroscience data analytics often focus on understanding how different brain regions—measured, e.g., by collocated electrodes—  
370 operate together and interact with each other during specific, randomly interleaved events, e.g., time intervals when a subject  
371 said ‘*baa*’ or performed a particular motion. The ability to annotate data by associating semantic metadata with data subsets is  
372 critical to facilitate these kinds of analyses. Annotating data in a scalable and usable fashion is challenging and relies on complex  
373 data structures to describe data selections and associated metadata.

374 To support data annotation, the BRAINformat library provides a series of modules that implement general and reusable data  
375 structures to describe individual data selections and data annotations (Sec. 3.3.1) and modules to manage and store collections  
376 of data annotations (Sec. 3.3.2). The BRAINformat annotation package supports annotation of in-memory data arrays (e.g.,  
377 numpy arrays) as well as in-file arrays (i.e., HDF5 datasets) and processing of data annotations may be performed in-memory or  
378 out-of-core (i.e., with the majority of data residing on disk and being only loaded when needed).

#### 379 3.3.1 Data Selection and Annotation

380 The first steps in annotating data is to describe 1) the data object that contains the data and 2) the data selection describing  
381 the subset of the data to annotate. The first part of describing the data object itself is generally simple and consists of either a  
382 basic reference to the data object in memory or an HDF5 link to the corresponding object in file. Describing data selections,  
383 however, is in practice not as simple. In the context of neuroscience data, researchers often need to generate a large numbers  
384 of annotations that refer to complex subsets of data, leading to advanced data selection, storage, and API requirements for  
385 describing, storing, and interacting with data selections. For example, along a single axis (such as time), features of interest

|                              |                                                                             | Slice [start:stop:step]                      | Binary vector                                                                                                                                                                        | List of indices                                                                                                                                        | Word-aligned compressed bit vectors                                                                                             |
|------------------------------|-----------------------------------------------------------------------------|----------------------------------------------|--------------------------------------------------------------------------------------------------------------------------------------------------------------------------------------|--------------------------------------------------------------------------------------------------------------------------------------------------------|---------------------------------------------------------------------------------------------------------------------------------|
| Data selection requirements  | Supports structured 1D selections                                           | Yes                                          | Yes                                                                                                                                                                                  | Yes                                                                                                                                                    | Yes                                                                                                                             |
|                              | Supports arbitrary 1D selections                                            | No                                           | Yes                                                                                                                                                                                  | Yes                                                                                                                                                    | Yes                                                                                                                             |
|                              | Supports common binary operations (AND, OR, NOT, XOR)                       | No                                           | Yes                                                                                                                                                                                  | Yes                                                                                                                                                    | Yes                                                                                                                             |
|                              | Supports structured multi-dimensional selections                            | Yes                                          | Yes                                                                                                                                                                                  | Yes                                                                                                                                                    | Yes                                                                                                                             |
|                              | Supports arbitrary multi-dimensional selections                             | No                                           | Yes (when using full Boolean maps)                                                                                                                                                   | Yes (when using multi-dimensional indices)                                                                                                             | Yes (extension to multi-dimensional compressed bitmaps possible but non-trivial)                                                |
| Storage and API requirements | Low storage requirements                                                    | Yes                                          | Highly compressible in file. Constant selection array size (n bytes per axis). Representing arbitrary, multi-dimensional selections depends directly on the size of the data object. | Grows linear with the number of selected elements and number of data dimensions. Compact for highly sparse selections. Expensive for dense selections. | Compact and highly compressed. Bitvectors can be merged and processed directly in compressed form.                              |
|                              | Multiple selections can be easily represented via a fixed number of arrays. | Yes                                          | Yes                                                                                                                                                                                  | Yes, but additional array index schema are needed to represent varying size selection vector in a compact array data structure.                        | Yes, but additional array index schema are needed to represent varying size selection vector in a compact array data structure. |
|                              | Selection vectors can be directly interpreted without the BRAIN format API  | Yes                                          | Yes                                                                                                                                                                                  | Yes                                                                                                                                                    | No                                                                                                                              |
| Summary                      | Main Advantages                                                             | Simple and easy-to-use                       | Fulfills most requirements                                                                                                                                                           | Fulfills most requirements                                                                                                                             | Highly efficient                                                                                                                |
|                              |                                                                             | Constant selection vector size               | Easy to use                                                                                                                                                                          | Easy to use                                                                                                                                            |                                                                                                                                 |
|                              |                                                                             | Compact storage requirements                 | Constant selection vector size                                                                                                                                                       | Efficient for sparse selections                                                                                                                        |                                                                                                                                 |
|                              |                                                                             | Easy to represent and use in file and memory | Compact storage due to high compressibility                                                                                                                                          |                                                                                                                                                        |                                                                                                                                 |
|                              | Main Disadvantages                                                          | Suited for highly structured selections only | Expensive when having to keep many selections in uncompressed form in memory.                                                                                                        | Expensive for dense selections.                                                                                                                        | Hard to use without dedicated API                                                                                               |
|                              |                                                                             |                                              | Expensive for arbitrary selections                                                                                                                                                   | Variable length selection vectors depending on selection size                                                                                          | Variable length selection vectors depending on selection size                                                                   |
|                              |                                                                             |                                              |                                                                                                                                                                                      |                                                                                                                                                        | Extension to arbitrary selections can be non-trivial                                                                            |

**Figure 7.** High-level comparison of four common schema for representing data selections. In each case, structured, multi-dimensional selections are constructed by the intersection (AND) of one-dimensional selections along the individual axes while *None* is used to efficiently describe the selection of all elements along a given axis.

386 are often discontinues—e.g., when describing multiple events of the same type—and complex features are often the result of  
 387 combinations of basic features along multiple dimensions—e.g., the output measured by electrodes located in the hippocampus  
 388 while the animal is in a specific location.

389 The table in Fig. 7 provides a high-level comparison of four common schema for describing data selections (columns) with  
 390 respect to their general behavior in regard to some main requirements for annotating neuroscience data (rows). Slicing is a  
 391 very convenient way to express highly structured selections that can be described via a simple tuple of (*start*, *stop*, *step*) but it  
 392 does not support selection of complex data subsets. Binary vectors—describing for each element along a given axis whether  
 393 the element is selected—are generally a good option. One main disadvantage of binary vectors is that the memory cost can  
 394 be high when having to process a large number of selections in uncompressed form in memory. In practice, however, most  
 395 operations can be performed iteratively and out-of-core. Lists of indices—describing along each axis the specific, selected  
 396 elements—are also a very good option. The main disadvantage of index lists lies in the high cost for describing dense selections  
 397 and the variable length arrays needed to describe the selections. More advanced data selection methods, such as, word-aligned  
 398 hybrid compressed bitmap indices [17, 18] are also very promising. One main disadvantage of such advanced indexing schema  
 399 is that they are not easily interpreted without a dedicated API, potentially hindering reuse of the HDF5 files. For the initial  
 400 development of the BRAINformat annotation API and format we have chosen binary vectors as the main scheme to represent  
 401 complex data selections and are planning to add support for additional schema in the future.

402 Fig. 8(a) illustrates how we can represent and combine complex selections using binary vectors. Along each dimension we  
 403 store a binary vector describing the elements that are selected (True, color) or not selected (False, white). This allows us to  
 404 easily represent arbitrary selections using constant-length selection vectors. The binary vectors can be efficiently combined

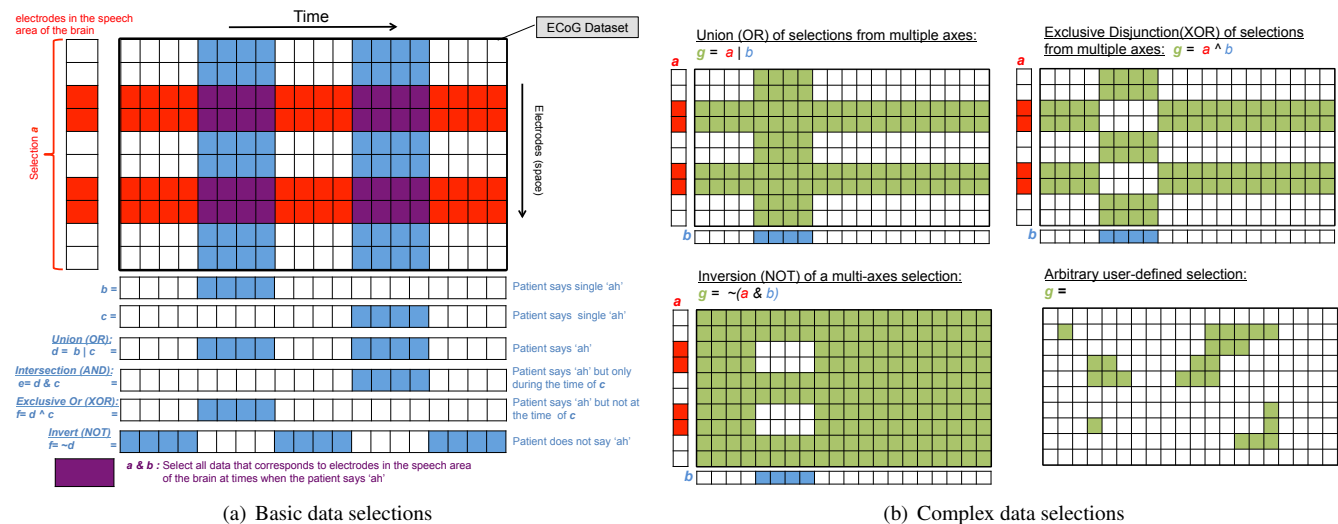

**Figure 8.** Overview of common data selections and binary combinations of data selections. **(a)** Basic data selections are defined via 1D binary vectors demarking the elements selected along a given dimension. Basic multi-dimensional selections are then defined via binary *AND* (&) combinations of such per-axis binary vectors. This allows complex selections to be expressed and stored efficiently. Along a given axis we may combine selections via boolean operations—including, *AND*, *OR*, *XOR*, and *NOT*—without the need to expand the selection to a complex selection. **(b)** We support complex selections that cannot be expressed via combinations of hyper-slices through expansion of the selection to a full binary map allowing the definition of arbitrary selections. Complex selections are required in practice to define *OR*, *XOR*, and *NOT* combinations of multi-dimensional selections and for arbitrary user selections.

405 directly using common binary operations and multi-dimensional selections can be easily described by the intersection of multiple  
 406 binary vectors. Arbitrary multi-dimensional selections—needed to describe complex, multi-dimensional combinations of basic  
 407 selections and arbitrary user-defined selections—can be described via full binary selection masks (see Fig. 8(b)).

408 Now that we can describe data selections, we can extend our design to define annotations. A single data annotation in  
 409 BRAINformat consists of the following main elements: **i)** the data selection object describing the data object and subregion of  
 410 the data the annotation applies to, **ii)** a user-defined string indicating the type of the annotation, **iii)** a human-readable description  
 411 of the annotation, and **iv)** a dictionary of additional user-defined properties of the annotation, Currently the format requires that  
 412 the keys of the properties dictionary are strings and that the values are arbitrary, basic data objects, e.g, stings or numbers. This  
 413 simple design allows us to describe complex annotations in an easy-to-use fashion.

414 The BRAINformat data selection and annotation API can be used to annotate any data object that can describe its shape as an  
 415 n-dimensional array and supports numpy/h5py-style array slicing, including numpy arrays, HDF5 datasets, and certain managed  
 416 objects that implement an array-like interface. The data selection and annotation API supports (among other things):

- 417 • Selection of elements via basic array slicing and assignment, e.g., to select the first five elements along the *time* axis for a  
 418 data selection *A*, we may write  $A[time', 0 : 5] = True$ .
- 419 • Retrieval of the selection vector along a given axis via simple slicing, e.g,  $A[time']$ .
- 420 • Retrieval of the data selected by an annotation or data selection via  $A.data()$ .
- 421 • Common binary operations to merge data selections and annotations, including i) *AND*, ii) *OR*, iii) *NOT*, and iv) *XOR*.
- 422 • Comparison of data selections and annotations via common operations, such as  $>$ ,  $>=$ ,  $<$ ,  $<=$ ,  $==$ ,  $!=$ , and *in*. These  
 423 operations are based on the comparison of the selected array indices so that, e.g.,  $A > B$  is only true if *B* is a true subset of  
 424 *A* (in contrast to a simple length-based comparison which would only require  $|A| > |B|$ ).
- 425 • Preceded ( $A << B$ ) and follows ( $A >> B$ ) operations describing whether all elements selected by *A* have array indices  
 426 less than or greater than *B*, respectively. This is useful, for example, to identify if an event in *time* selected by *A* occurs  
 427 before/after *B*.

- 428 • Basic investigation via functions like *len*, *count*, *counts*, *axes* or *axis\_bounds* to retrieve the total and per-axis number  
429 of elements selected or the axes that are restricted and index ranges *et cetera*.

### 430 3.3.2 Managing Collections of Data Annotations

431 So far we have focused on describing single annotations. Neuroscience analytics often rely on large collections of annotations  
432 to describe, e.g., multiple behavioral measures, external stimuli, brain regions and many other types of annotations. During the  
433 course of an experiment we often encounter many thousands of events and features of a given type and in some cases millions  
434 (e.g. action potentials). Storing all these annotations individually would quickly result in an explosion of datasets and groups in  
435 the HDF5 file, hindering both usability and computational performance. It is, therefore, critical that we can represent collections  
436 of annotations in a compact fashion via a limited number of data objects (Fig. 7). In addition, we need to be able to easily search  
437 collections of annotations to locate subsets of annotations of interest, e.g., all annotations describing movements to a specific  
438 region in space.

439 Annotation collections are managed in the BRAINformat library by the *AnnotationDataGroup* (and *AnnotationCollection*)  
440 module, which uses the *ManagedObject* design (see Section 3.1.1) to define a general, reusable, and extensible storage module  
441 and format for collections of data annotations. Each collection of annotations applies to a specific data object and has a  
442 user-defined description. The corresponding binary selection vectors of all annotations in a given collection have the same length,  
443 since all annotations refer to the same data object. For each data axis, we can store an arbitrary number of selections in a single  
444 two-dimensional data array with a shape of  $\#selections \times \#values$ . To reduce storage cost, we enable *gzip* compression  
445—which is natively supported by HDF5—when saving the binary data selection arrays to file. Using compression drastically  
446 reduces the size of data selections in file and enables us to efficiently store large collections of data annotations. The type,  
447 descriptions, and individual properties of all annotations are then stored separately in one-dimensional arrays. This simple  
448 scheme allows us to store an arbitrary number of annotations in a fixed number of arrays while allowing us to easily retrieve  
449 specific annotations as well as independently access individual fields for searching (e.g., annotation type, description, and  
450 individual properties).

451 Collections of annotations may be created in-memory or in-file. When accessing collections of annotations that are stored  
452 in-file, the bulk of the data—such as the selection properties and binary selection vectors—typically remain out-of-core and are  
453 only read when needed, for example when searching for annotations based on a particular property. To ease the use of collections  
454 of annotations, the BRAINformat API supports:

- 455 • **Filtering** (i.e., search) of annotations to locate annotations based on the:
- 456 i) index of annotations,
  - 457 ii) axes that are restricted by the annotations to find, e.g., all annotations that select features in *time*,
  - 458 iii) full or partial type of annotations to find, e.g., all annotations that define a *speech event*,
  - 459 iv) full or partial description of annotations, and
  - 460 v) full or partial user-defined metadata properties of annotations to find e.g., all annotations that have a particular  
461 user-level, start time or stop time etc..
- 462 All filter functions return one-dimensional binary selection vectors that can be easily combined via standard binary  
463 operations. This allows us to easily define complex queries. For example to locate all *speech events* when a subject said  
464 'baa' in a collection of annotations *C*, we can simply write *C.type\_filter('speech event') & C.property\_filter(key =*  
465 *vocalization', value = 'baa')*.
- 466 • **Selection** of subsets of annotations, i.e., the creation of new collections of annotations through the application of a filter via  
467 basic slicing, e.g., *C[C.type\_filter('speech event')]*.
  - 468 • **Merging** of all annotations in a collection to a single annotation via union (*OR*), intersection (*AND*), and exclusive  
469 disjunction (*XOR*).



- 470 • **Loading/retrieval** of the individual annotations and data selected by the annotations in the collection.
- 471 • **Basic introspection** to retrieve information about, e.g., the number of annotations, list of unique annotation types and
- 472 descriptions, properties, etc..
- 473 • **Creation, expansion, and saving** of annotation collections.
- 474 Other more specialized functions of annotation collections include the calculation of a containment matrix, describing which
- 475 annotations are contained in each other. This is useful in the context of hierarchically organized annotations. For example, in the
- 476 context of speech, we have annotations that describe individual *syllables*, *words*, *sentences* and so on.

## 4 RESULTS

### 477 4.1 Applications to Neuroscience Data

478 In the following we describe the application of the BRAINformat data standardization framework to the development of a data

479 format for neuroscience data with an initial focus on electrocorticography (ECoG) data collected from neurosurgical patients

480 during speech production. This data shares many requirements with standard electrophysiology data collected by the broader

481 neuroscience community: storage of voltage recordings over time across multiple spatial distributed sensors with heterogenous

482 geometries, complex and multi-tiered task descriptions, post-hoc processing of raw data to extract the signal of interest, the

483 association of physiology data with multi-modal data streams collected simultaneously by other devices, the linkage of data

484 associated with the same 'task' across multiple sessions, and the necessity to store rich meta-data to make sense of it all.

#### 485 4.1.1 High-level Data Organization

486 Fig. 9 shows an example visualization of a BRAINformat file using HDFView. The tree view shown on the left illustrates the

487 high-level data hierarchy. In our discussion of the high-level data organization we use the following notation to denote the path

488 in HDF5 and corresponding managed type: *path* : *managed type*.

489 In the main HDF5 file */ : BrainDataFile* the data is organized in a basic semantic hierarchy. On the highest level we

490 distinguish between data and descriptors, i.e., raw and processed data generated through experimentation and analysis vs.

491 globally accessible metadata. We then further distinguish between static metadata (i.e. descriptions of the basic data acquisition

492 and experimental parameters) and dynamic metadata (e.g. descriptions of post-processing parameters) and categorize data into

493 internal data (i.e. data collected inside the brain, e.g. electrophysiology recordings) and external data (i.e. data collected external

494 to the animal, e.g. sensory stimuli, audio recordings, position of body parts, etc.). These divisions are not strictly necessary, but

495 impose some minimal structure on the format that eases the interpretability by users. The following list illustrates the high-level

496 data organization in more detail:

- 497 • */data : BrainDataData* contains the actual raw and processed data generated through experimentation and analysis.
- 498 • */data/internal : BrainDataInternalData* contains all internal data, i.e., all raw and processed data
- 499 from physiological measurements.
- 500 • */data/internal/ecog\_data\_# : BrainDataECoG* is designed for storage of voltage
- 501 recordings over time across multiple spatially distributed sensors with heterogenous
- 502 geometries, and complex and multi-tiered task descriptions (see Sec. 4.1.2).
- 503 • */data/internal/ecog\_data\_processed\_# : BrainDataECoGProcessed* is derived
- 504 from *BrainDataECoG* and is designed for storage of post-processed voltage
- 505 recordings over time across multiple spatial distributed sensors where signals of
- 506 interest have been extracted and optionally categorized (see Sec. 4.1.3).

- 507                   • ***/data/external*** : ***BrainDataExternalData*** is used to collect all external data, such as recordings of  
508                   sensory stimuli and other external measurements.
- 509           • ***/descriptors*** : ***BrainDataDescriptors*** is a container for global metadata. Specific metadata objects may be referenced in  
510           other managed objects via HDF5 links. This strategy avoids redundant storage while at the same time providing easy access  
511           to the data from specific data groups and allowing scientists to collect general metadata in a central location, facilitating  
512           meta- and mega analysis.
- 513                   • ***/descriptors/static*** : ***BrainDataStaticDescriptors*** is a container for static metadata, e.g., metadata  
514                   describing the instruments and other fixed information.
- 515                   • ***/descriptors/dynamic*** : ***BrainDataDynamicDescriptors*** is a container for dynamic metadata, e.g.,  
516                   information that is derived through post-hoc analyses or metadata that may dynamically change during  
517                   the data life cycle.

518     In practice, scientists regularly acquire data in series of distinct experiment sessions often distributed over long periods of time.  
519     To facilitate management and sharing of data, it is useful to store the data generated from such distinct recordings in separate  
520     data files, yet for analysis purposes the data often needs to be analyzed in context. To allow the organization of related data  
521     files we support the grouping of files in container files ***/:BrainDataMultiFile*** in which each primary ***BrainDataFile*** file is  
522     represented by an HDF5 group ***/entry\_#*** that defines an external link to the root group of the corresponding file. This simple  
523     concept enables users to interact with the data as if it were located in a single file while the data is physically being stored  
524     distributed across many files.

525     In addition to the format-specific modules described so far, we use the generic ***AnnotationDataGroup*** (see Sec. 3.3.2)  
526     managed type for management and storage of collections of annotations associated with raw data and processed data (Sec. 3.3.2).  
527     We also use the generic ***ManagedObjectFile*** module (see Sec. 3.1.1) to support modular storage of managed objects in separate  
528     HDF5 files (which are in turn included in the parent via an external links). This allows users to flexibly store and share analytics  
529     as independent files while at the same time making the results easily accessible from the main data file and limiting the need for  
530     large-scale updates to the main file.

531     We will next discuss the storage of voltage recordings over time across multiple spatial distributed sensors via the  
532     ***BrainDataECoG*** and ***BrainDataECoGProcessed*** modules in more detail. For further details on the data organization we  
533     refer the interested reader to the specification documents of the data format shown in Supplement 2 (pp 35 – 62). Figure 1 also  
534     shows an abbreviated version of the specification document, listing all current managed object types in blue.

#### 535 4.1.2 Storing ECoG Data

536     A central application in neuroscience data is the acquisition and storage of voltage recordings over time across multiple spatial  
537     distributed sensors, e.g., via electrocorticography (ECoG), multi-channel electrophysiology from silicon shanks or Utah arrays.  
538     In the following we focus in particular on electrocorticography (ECoG) data collected from neurosurgical patients during speech  
539     production, however, we intend to extend these capabilities to other use-cases as well—such as physiology data collected in  
540     model species during standard sensory, motor, and cognitive neuroscience tasks—and the format has been designed with this  
541     extensibility in mind.

542     The ***BrainDataECoG*** module defines a managed group in HDF5 that serves as a container to collect all data pertaining to the  
543     voltage recordings in a single location. The primary dataset ***raw\_data*** defines a two-dimensional, *space* × *time* array storing  
544     electrical recordings in units of *Volts*. Auxiliary information about the data, e.g, the ***sampling\_rate***, in *Hz*, the ***unit*** of *Volts*,  
545     and the spatial ***layout*** of the electrodes are stored as additional datasets and attributes.

546     The ***raw\_data*** is also further characterized via a series of dimensions scales describing: **1**) the identifier of electrodes (e.g.  
547     linear channel index from DAQ) (***electrode\_id***), **2**) the sample time in milliseconds (***time\_axis***), and optionally **3**) the anatomical  
548     name (***anatomy\_name***) and integer id (***anatomy\_id***) of the spatial region where each electrode is located. In addition, the

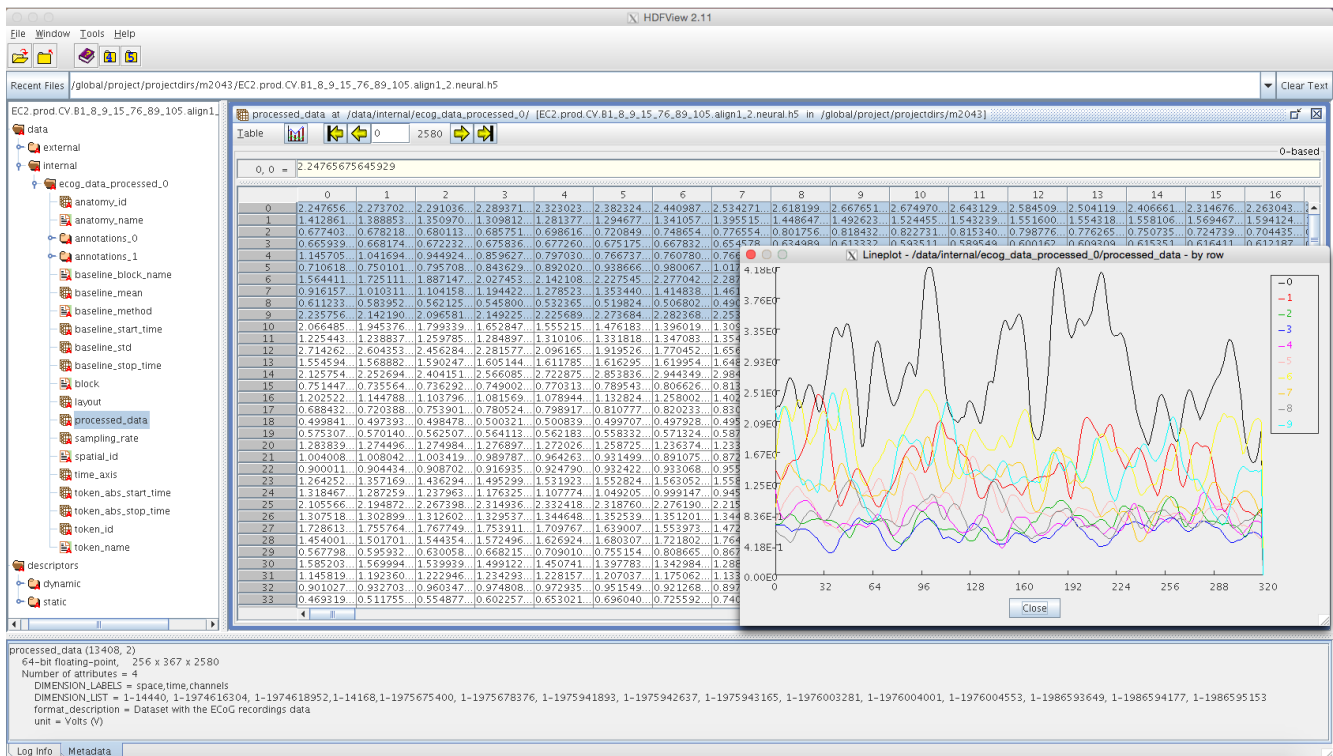

**Figure 9.** Example HDFView [15] visualization of a BRAINformat file. **Left:** Tree view of the basic data hierarchy. **Right:** Table view of a processed ECoG dataset and curve plot of the first 10 waveforms. **Bottom:** Summary of properties and attributes of the processed ECoG data array.

549 **BrainDataECoG** API provides convenient functions to allow users to easily add custom dimension scales to the data. Dimension  
550 scales are described by: **1)** a data array with the scale's data, **2)** the name of the unit of the data values, **3)** a human-readable  
551 description of the contents of the scale, **4)** the name of the scale, and **5)** the axis with which the scale is associated. The ability to  
552 easily generate custom dimension scales enables users to conveniently associate additional descriptions with the data, e.g., scales  
553 describing the classification of electrodes or time values into unique groups/clusters or to encode the occurrence of different  
554 events in time, such as, speech events or neural spikes among many others. Dedicated functions for look-up and retrieval of all  
555 or select dimensions scales—including all auxiliary data, e.g., the units or description of the scale(s)—ease the integration and  
556 use of dimensions scales for analytics.

557 Dimensions scales are limited in that they are one-dimensional in nature—specifically, even though the scale's dataset may be  
558 an arbitrary n-dimensional array, the data is strictly associated with a particular dimension of the main dataset—and are not  
559 well-suited to describe complex structures, such as, multi-level data classifications with overlapping clusters. We, therefore, use  
560 the `/data/internal/ecog_data_#/annotations_#`: **AnnotationDataGroup** module (see Sec. 3.3.2) for storage and management  
561 of complex data annotations. The anatomical data, e.g., is automatically stored both via a dimension scale as well as annotations  
562 to facilitate the use of the anatomy in advanced analytics. The **BrainDataECoG** API also provides a number of convenience  
563 functions to assist with the interaction with and creation of custom collections of data annotations to conveniently associate  
564 play a critical role in advanced analytics based on the classification of the data, e.g., based on the occurrence of events in time  
565 such as neural spikes or speech events. The definition of speech events in particular depends heavily on the ability to define many  
566 different types of annotations in conjunction with complex user-defined metadata associated with the annotations. For example,  
567 speech events occur at a broad range of nested classes, ranging from individual phonemes to syllables, words, and sentences etc..  
568 The same speech event can occur arbitrary often during the course of an experiment—e.g. patient says 'baa'—and different  
569 events can overlap—e.g., the sound 'baa' is part of the words 'bad'. The ability to query annotations to locate particular speech  
570 events and subsequently analyze the data with such events is critical to the study of neural activity during speech production.

571 Data annotation provides an ideal framework for storage and analysis of many derived classifications of electrical recordings, for  
572 example to define the occurrence of neural spikes via spike sorting.

573 As described earlier, the creation of managed objects is standardized, i.e., to create a new *BrainDataECoG* managed object  
574 we simply call the *BrainDataECoG.create(...)* function. All required data structures are initialized during the creation process,  
575 ensuring that the data file is always valid. Other, optional structures (e.g. the anatomy) may be saved directly during the creation  
576 or added later. To ease the use of *BrainDataECoG* during data acquisition, the create process allows the raw data and associated  
577 dimension scales to be initialized as empty datasets. As new recordings are acquired over time the *raw\_data* and associated  
578 dimensions scales are then automatically expanded to accommodate the new data. With this so-called *auto-expand-data* feature  
579 enabled we can, for example do the following:

```
>>> from brain.dataformat.brainformat import BrainDataFile, BrainDataECoG
>>> import numpy
>>> brainfile = BrainDataFile.create('testfile.h5') # Create the file and initialize the data hierarchy
>>> internal_data = brainfile.data().internal() # Get the managed object for storing internal data
>>> ecog_data = BrainDataECoG.create(parent_object=internal_data , # Add to /data/internal
                                   ecog_data_shape=(32,0), # Empty recording for 32 electrodes
                                   ecog_data_type='f', # Store float data values
                                   chunks=True) # Store the data using chunking
>>> ecog_data.set_auto_expand(True) # Enable auto expansion
>>> ecog_data[:, 0:1000] = numpy.arange(32*1000).reshape(32,1000) # Add new data
```

580 Note when adding the new data, the shape of our ECoG dataset is automatically expanded to  $32 \times 1000$  and all one-dimensional  
581 dimension-scales that are associated with the time axis are automatically expanded to match the new data shape so that we can  
582 also conveniently update the data of dimension scales without having to resize the datasets manually. As the above example  
583 illustrates, the *BrainDataECoG* API provides a convenient interface that allows us to directly interact with the primary *raw\_data*  
584 via array slicing while auxiliary data, e.g., the sampling rate, layout, annotations etc., can be easily retrieved via corresponding  
585 access functions or key-based slicing(similar to Python dictionaries).

#### 586 4.1.3 Storing Processed ECoG Data

587 In practice, ECoG and other temporal voltage recordings across multiple sensors, are often further processed to extract  
588 specific, fixed-length tokens/features (e.g. phonemes or task trials) from the data. As a result the data is often reorganized as a  
589 three-dimensional array of *space*  $\times$  *time*  $\times$  *token*. The *BrainDataECoGProcessed* module is derived from *BrainDataECoG*  
590 and extends it to support storage of such processed data. Specifically: **1)** the primary dataset is extended by a third dimension  
591 to store the different *channels* and the dataset is renamed to *processed\_data*, **2)** a set of new optional dimension scales are  
592 specified to describe the *frequency\_bands*, *token\_id*, and *token\_name*. Similar to the anatomy data, token data is stored  
593 both as dimension scales as well as via metadata-rich, searchable annotations to facilitate data analysis.

594 Figure 9 shows an example visualization of a processed ECoG dataset stored using our proposed data format. The tree view  
595 on the left shows the file structure, including all datasets associated with the */data/internal/ecog\_data\_processed\_#* group. The  
596 table view on the right then shows the contents of the primary *processed\_data* dataset and the curve plot shows the voltage  
597 signal over time for a select set of tokens/electrodes. The properties view at the bottom then shows the shape, data type, and  
598 attributes associated with the main dataset.

## 5 CONCLUSIONS AND FUTURE WORK

599 Neuroscience is facing an incredible big data challenge. Efficient and easy-to-use data standards are a critical foundation  
600 to solving this challenge by enabling efficient storage, management, sharing, and analysis of complex neuroscience data.  
601 Standardizing neuroscience data is as much about defining common schema and ontologies for organizing and communicating

602 data as it is about defining basic storage layouts for specific data types. Arguably, the focus of a neuroscience-oriented data  
603 standard should be on addressing the application-centric needs of organizing scientific data and metadata, rather than on  
604 reinventing file storage and format methods. For the development of BRAINformat we have used HDF5 as the basic storage  
605 format, because it already satisfies a broad range of the more basic format requirements.

606 The complexity and variety of experiments and the diversity of data types and acquisition modalities used in neuroscience  
607 make the creation of a general, all-encompassing data standard a daunting—if not futile—task. We have introduced the concept  
608 of *Managed Objects* (and *Managed Types*), which—in combination with an easy-to-use, formal format-specification document  
609 standard and API—enables us to divide & conquer the data standardization problem in a modular and extensible fashion. Format  
610 components specified using these concepts can be easily reused and extended and the format-compliance of file objects can  
611 be easily verified using the the BRAINformat library. The format specification API and managed object API implemented in  
612 BRAINformat are not specific to neuroscience, but define application-independent design concepts that enable us to efficiently  
613 create application-oriented data format modules. Based on these concepts we have developed an extensible data standard for  
614 neuroscience data that is portable, scalable, extensible, self-describing, and that supports self-contained (single-file) and modular  
615 (multiple-linked-files) storage.

616 We have also introduced a novel data format module and API for storage and management of advanced data annotations,  
617 enabling scientists to further characterize and organize data subsets via additional metadata descriptions. Additionally, we  
618 described the novel concept of relationship attributes for modeling and use of structural and semantic relationships between  
619 primary storage objects—including advanced index map relationships based on the concept of relationship chains. Although  
620 these features are available through an API, the data stored in the format is fully specified and human readable, so that domain  
621 scientists can access the data even without our API. These advanced capabilities fill critical gaps in the portfolio of available tools  
622 for creating advanced data standards for modern scientific data. The BRAINformat library is open source, has detailed developer  
623 documentation and user tutorials, and is freely available at: <https://bitbucket.org/oruebel/brainformat>.

624 In our future work we plan to extend the BRAINformat via advanced support for metadata ontology and data type specification  
625 capabilities and efficient metadata search, as well as expansion of the data annotation modules by supporting additional data  
626 selection schema and representations. We will develop capabilities to enable linking and interaction with external data stored in  
627 third-party formats (e.g. movies or images) and will develop additional data modules needed to provide a broader coverage of  
628 use cases in neuroscience research.

629 For concreteness, so far we have focused application of BRAINformat to electrocorticography data collected from neurosurgical  
630 patients during speech production. At the surface, it may appear that this is a specialization that hinders the general applicability  
631 of our work to the broader neuroscience community. However, the electrocorticography data shares many requirements with  
632 standard electrophysiology data collected by the community: storage of voltage recordings over time across multiple spatial  
633 distributed sensors with heterogenous geometries, complex and multi-tiered task descriptions, post-hoc processing of raw data  
634 to extract the signal of interest, the association of physiology data with multi-modal data streams collected simultaneously  
635 by other devices, the linkage of data associated with the same 'task' across multiple sessions, and the necessity to store rich  
636 meta-data to make sense of it all. Use of our format as input to popular spike-sorting algorithms, such as KlustaKwik [7], should  
637 be straightforward. Importantly, the utilization of metadata-rich Annotations are a natural way to encode the occurrence of  
638 spikes and associated parameters in the context of the original data, while relationship attributes provide an ideal foundation for  
639 recording relationships between analytics and other data. Therefore, application of BRAINformat to physiology data collected  
640 in model species during standard sensory, motor, and cognitive neuroscience tasks should be straightforward. Indeed, this has  
641 been our goal all along.

## ACKNOWLEDGMENTS

642 This work was supported by Laboratory Directed Research and Development (LDRD) funding from Berkeley Lab, provided by  
643 the Director, Office of Science, of the U.S. Department of Energy under Contract No. DE-AC02-05CH11231. This research  
644 used resources of the National Energy Research Scientific Computing Center, a DOE Office of Science User Facility supported  
645 by the Office of Science of the U.S. Department of Energy under Contract No. DE-AC02-05CH11231. We would like to thank  
646 Fritz Sommer, Jeff Teeters, Annette Greiner for helpful discussions. We would like to thank the members of the Chang Lab  
647 (UCSF) and Denes Lab (LBNL) for helpful discussions, data, and support.

## LEGAL DISCLAIMER

648 This document was prepared as an account of work sponsored by the United States Government. While this document is believed  
649 to contain correct information, neither the United States Government nor any agency thereof, nor The Regents of the University  
650 of California, nor any of their employees, makes any warranty, express or implied, or assumes any legal responsibility for the  
651 accuracy, completeness, or usefulness of any information, apparatus, product, or process disclosed, or represents that its use  
652 would not infringe privately owned rights. Reference herein to any specific commercial product, process, or service by its trade  
653 name, trademark, manufacturer, or otherwise, does not necessarily constitute or imply its endorsement, recommendation, or  
654 favoring by the United States Government or any agency thereof, or The Regents of the University of California. The views and  
655 opinions of authors expressed herein do not necessarily state or reflect those of the United States Government or any agency  
656 thereof or The Regents of the University of California.

## REFERENCES

- 657 [1]JSON: JavaScript Object Notation, 1999 – 2015. [ONLINE] <http://json.org/>.
- 658 [2]T. Bray, J. Paoli, C. Sperberg-McQueen, E. Maler, and F. Yergeau. Extensible markup language (xml), 2008. [ONLINE]  
659 <http://www.w3.org/TR/2008/REC-xml-20081126/>.
- 660 [3]J. Clarke and E. Mark. Enhancements to the extensible data model and format (xdmf). In *DoD High Performance Computing*  
661 *Modernization Program Users Group Conference, 2007*, pages 322–327, June 2007.
- 662 [4]P. Gleeson, A. Crook, R. C. Cannon, M. L. Hines, C. O. Billings, M. Farinella, T. M. Morse, A. P. Davison, S. Ray, U. S.  
663 Bhalla, S. R. Barnes, Y. D. Dimitrova, and R. A. Silver. NeuroML: A Language for Describing Data Driven Models of  
664 Neurons and Networks with a High Degree of Biological Detail. *PLoS Computational Biology*, 6(6), 2010.
- 665 [5]J. Grewe, T. Wachtler, and J. Benda. A Bottom-up Approach to Data Annotation in Neurophysiology. *Frontiers in*  
666 *Neuroinformatics*, 5(16), 2011.
- 667 [6]S. N. Kadir, D. F. M. Goodman, and K. D. Harris. Klustakwik, 2013 – 2015. [ONLINE] [http://klusta-team.](http://klusta-team.github.io/klustakwik/)  
668 [github.io/klustakwik/](http://klusta-team.github.io/klustakwik/).
- 669 [7]S. N. Kadir, D. F. M. Goodman, and K. D. Harris. High-dimensional cluster analysis with the Masked EM Algorithm.  
670 *arXiv.org*, September 2013. [arXiv:1309.2848 [q-bio.QM]].
- 671 [8]P. Klosowski, M. Koennecke, J. Tischler, and R. Osborn. Nexus: A common format for the exchange of neutron and  
672 synchrotron data. *Physica B: Condensed Matter*, 241:151–153, 1997.
- 673 [9]F. R. Maia. The coherent x-ray imaging data bank. *Nature methods*, 9(9):854–855, 2012.
- 674 [10]R. Rew and G. Davis. NetCDF: an interface for scientific data access. *Computer Graphics and Applications, IEEE*,  
675 10(4):76–82, July 1990.
- 676 [11]O. Rübél, A. Greiner, S. Cholia, K. Louie, E. W. Bethel, T. R. Northen, and B. P. Bowen. Openmsi: A high-performance  
677 web-based platform for mass spectrometry imaging. *Analytical Chemistry*, 85(21):10354–10361, 2013.

- 678 [12]S. Shasharina, J. R. Cary, S. Veitzer, P. Hamill, S. Kruger, M. Durant, and D. A. Alexander. VizSchema–Visualization  
679 Interface for Scientific Data. In *IADIS International Conference, Computer Graphics, Visualization, Computer Vision and*  
680 *Image Processing*, page 49, 2009.
- 681 [13]A. Stoewer, C. J. Kellner, and J. Grewe. NIX, 2014. [ONLINE] <https://github.com/G-Node/nix/wiki>.
- 682 [14]The HDF Group. Hierarchical Data Format, version 5, 1997-2015. [ONLINE] <http://www.hdfgroup.org/HDF5/>.
- 683 [15]The HDF Group. HDFView, 2006 – 2015. [ONLINE] <http://www.hdfgroup.org/products/java/hdfview/>.
- 684
- 685 [16]U.S. Army Research Laboratory. eXtensible Data Model and Format (XDMF), 2011 – 2015. [ONLINE] <http://www.xdmf.org>.
- 686
- 687 [17]K. Wu, E. J. Otoo, and A. Shoshani. An efficient compression scheme for bitmap indices. *Lawrence Berkeley National*  
688 *Laboratory*, 2004.
- 689 [18]K. Wu, E. J. Otoo, and A. Shoshani. Optimizing bitmap indices with efficient compression. *ACM Transactions on Database*  
690 *Systems (TODS)*, 31(1):1–38, 2006.
